# Supplementary material
Source: Springer Nature journal article supplement (https://www.springermedizin.de/resource/supplementary/13643_2012_43_MOESM4_ESM.pdf/9681308)
Supplement: MOESM4 [file 9681308]

Broad review  
question

```
graph TD; A[Broad review question] --> B[Research synthesis]; A --> C[Other knowledge synthesis]; B --> D[Mixed knowledge synthesis]; C --> D;
```

The diagram is a flowchart with four blue rectangular boxes containing white text. At the top is the box 'Broad review question'. A vertical line descends from its bottom center, then a horizontal line branches out to the left and right. From the left end of this horizontal line, a vertical line goes down to the top center of the box 'Research synthesis'. From the right end, a vertical line goes down to the top center of the box 'Other knowledge synthesis'. From the bottom right corner of the 'Research synthesis' box, a diagonal arrow points down and to the right towards the top left corner of the box 'Mixed knowledge synthesis'. From the bottom left corner of the 'Other knowledge synthesis' box, a diagonal arrow points down and to the left towards the top right corner of the 'Mixed knowledge synthesis' box.

Research  
synthesis

Other  
knowledge  
synthesis

Mixed  
knowledge  
synthesis
